# Supplementary material
Source: PubMed Central journal article supplement (PMC2649423)
Supplement: 97320630003275S1.pdf [file 97320630003275S1.pdf]

### Supplementary material

|            | Glycolysis                                                                                                           | Apoptosis                                                                                          | MAPK                                                                                                                 | OXPHOS                                                                                                                |
|------------|----------------------------------------------------------------------------------------------------------------------|----------------------------------------------------------------------------------------------------|----------------------------------------------------------------------------------------------------------------------|-----------------------------------------------------------------------------------------------------------------------|
| <b>PC1</b> | +: AKR1A (I), BPGM, ALDH1A, ALDOB (I)<br><br>-: GPI (I), ALDOA (I), PGK1 (I), GAPDH (II), DLD (I), ENO3 (II), ADHFE1 | +: CFLAR (I), XIAP (I), PRKAR1A, IRAK4<br><br>-: CASP8 (I), ATM, AKT3 (III), PIK3R (I)             | + EGFR, FGF18 (I), MEF2C<br><br>-: ZAK (III), CDC42 (I), MAP3K2 (III), SOS1 (I), PPP3CA (I), EGFR, TAOK (MAP3K1) (I) | + COX4I1 (I), NDUFB10 (III), COX7 (I), NDUFA11 (I)<br><br>-: ATP5E<br>=: SDHA (II)                                    |
| <b>PC2</b> | -: GAPDH (II), ALDH1A, DLD (I), ACSS2 (I)<br><br>+: ACSS1 (II), BPGM, ADHFE1 (II)                                    | +: PPP3R (II), CASP3, TNFRSF1A<br><br>-: PRKAR1B, PRKAR2A (III), CYCS (II), XIAP (I), PRKAR2A (II) | + EGFR, CACNG8 (I), PPP3CA (I), MAP3K8, SOS1, PPM1A (I)<br><br>-: ZAK (III), MRAS, FGF12, PLA2G12A (I); GRB2 (III)   | + ATP5F, COX15 (I); UQCRC2 (I), NDUFS8 (I)<br><br>-: NDUFV3 (II), NDUFA9, NDUFA10, COX7B (I), UCRC (I)<br>= SDHA (II) |

**Table 1:** Gene probes with highest loadings in principal component (PC) 1 and 2. Genes fall into 4 categories, i.e. glycolysis, apoptosis, MAPK and Oxidative Phosphorylation (OXPHOS). Class type in parentheses (I, II, III).
